# Supplementary material for: Biological chromodynamics: a general method for measuring protein occupancy across the genome by calibrating ChIP-seq
Source: PubMed Central journal article supplement (PMC4787748; doi:10.1093/nar/gkv670), 2015-06-30
Supplement: supp_gkv670_nar-00886-met-k-2015-File003.pdf [file supp_gkv670_nar-00886-met-k-2015-File003.pdf]

Supplementary Figures 1

A

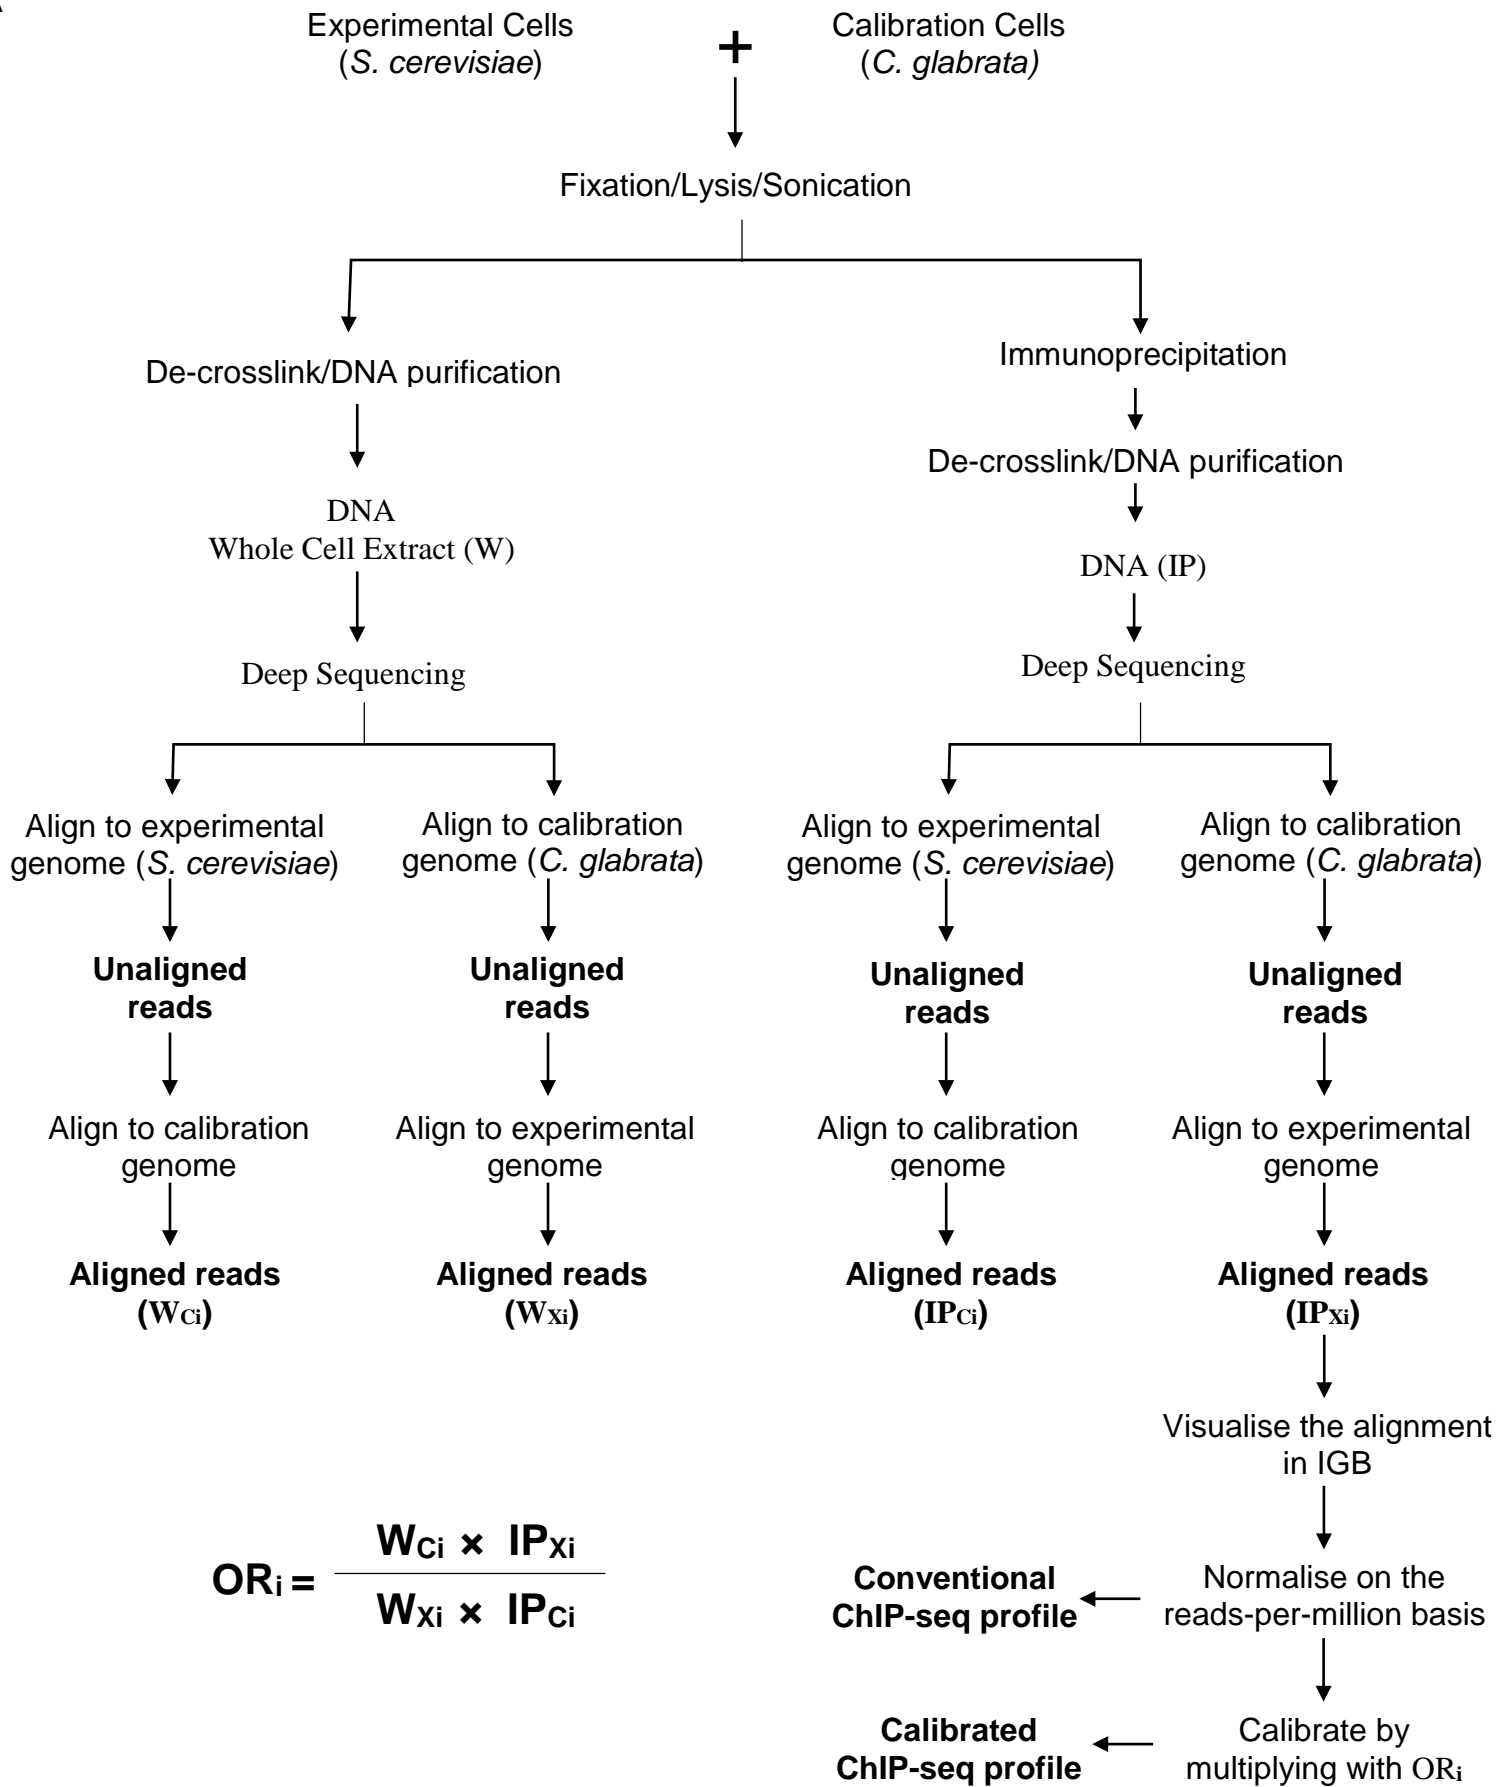

B

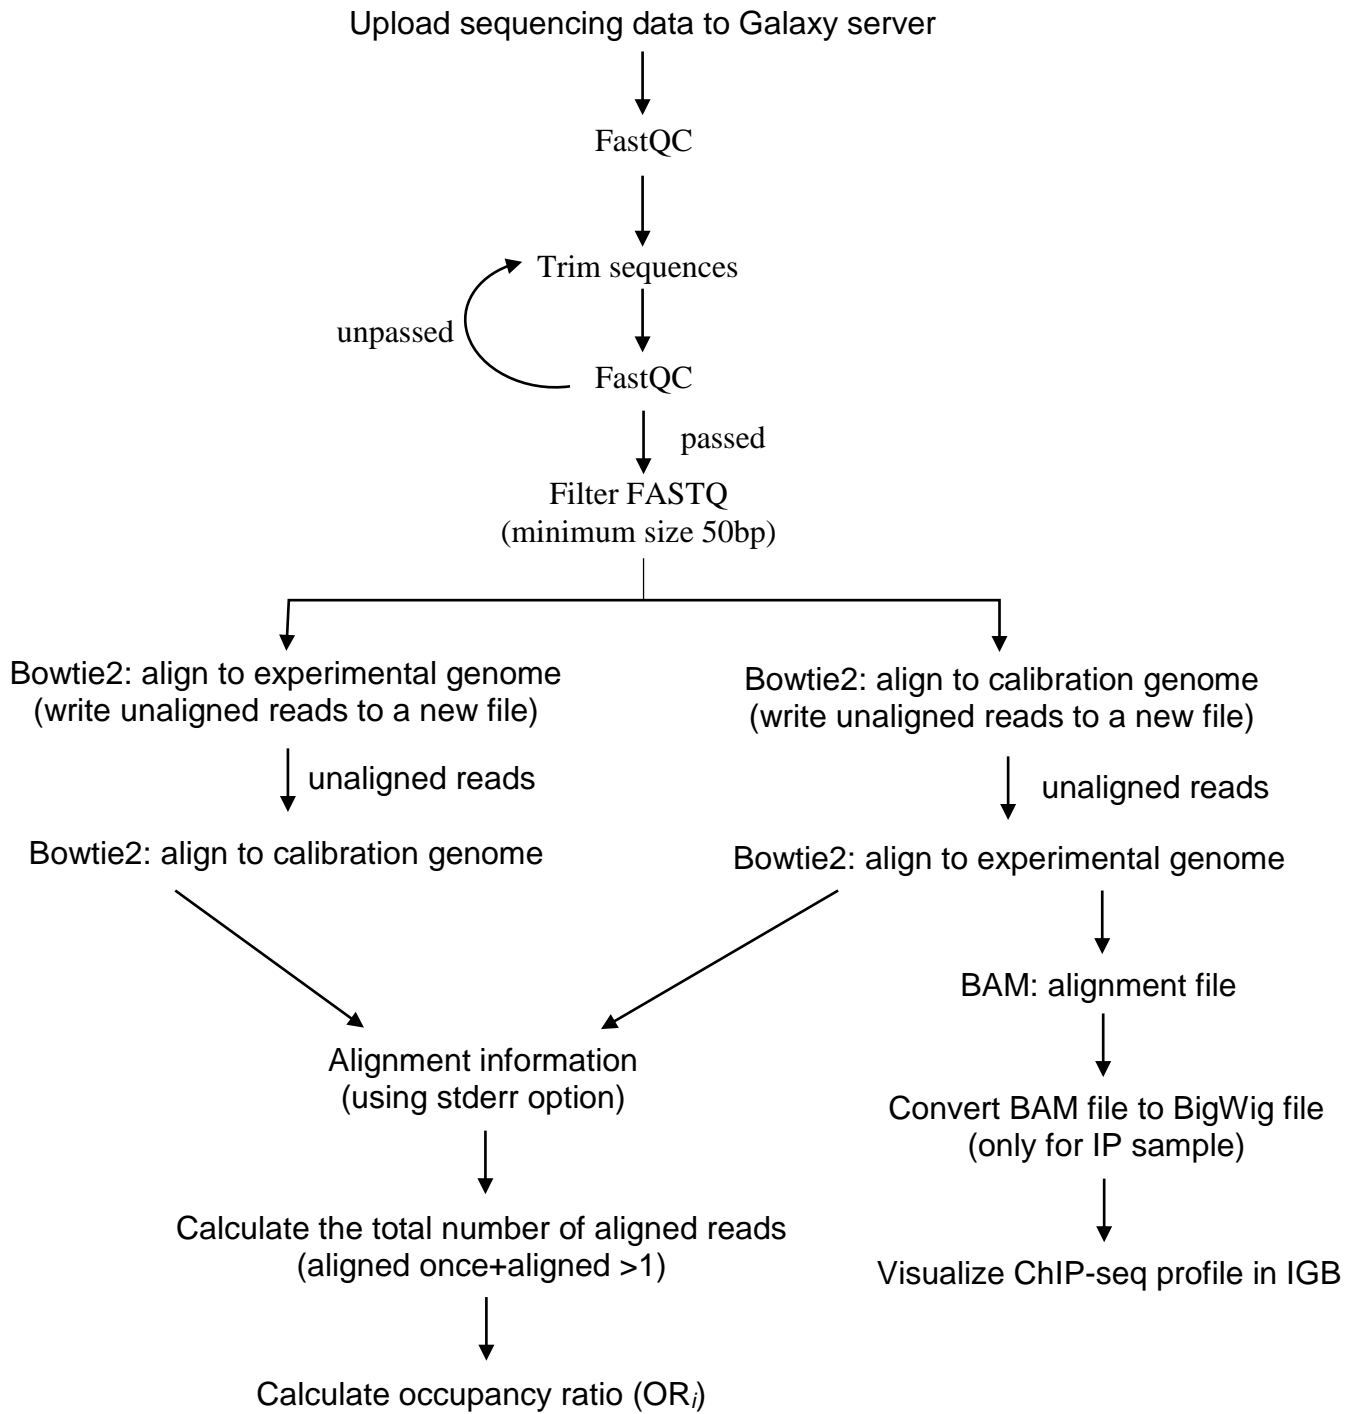

Supplementary Figures 1. (A) Flow scheme of the calibrated ChIP-seq procedure. (B) Analysis pipeline of sequencing data using Galaxy platform

Supplementary Figures 2

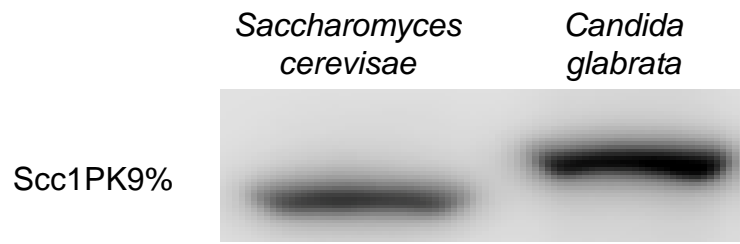

Supplementary Fig 2 Expression of Scc1PK9 in *Saccharomyces cerevisiae* and *Candida glabrata* cells. Proteins were extracted from exponentially grown yeast cells and resolved by SDS-PAGE. The Scc1PK9 were detected using anti-PK antibody.

Supplementary Fig 3

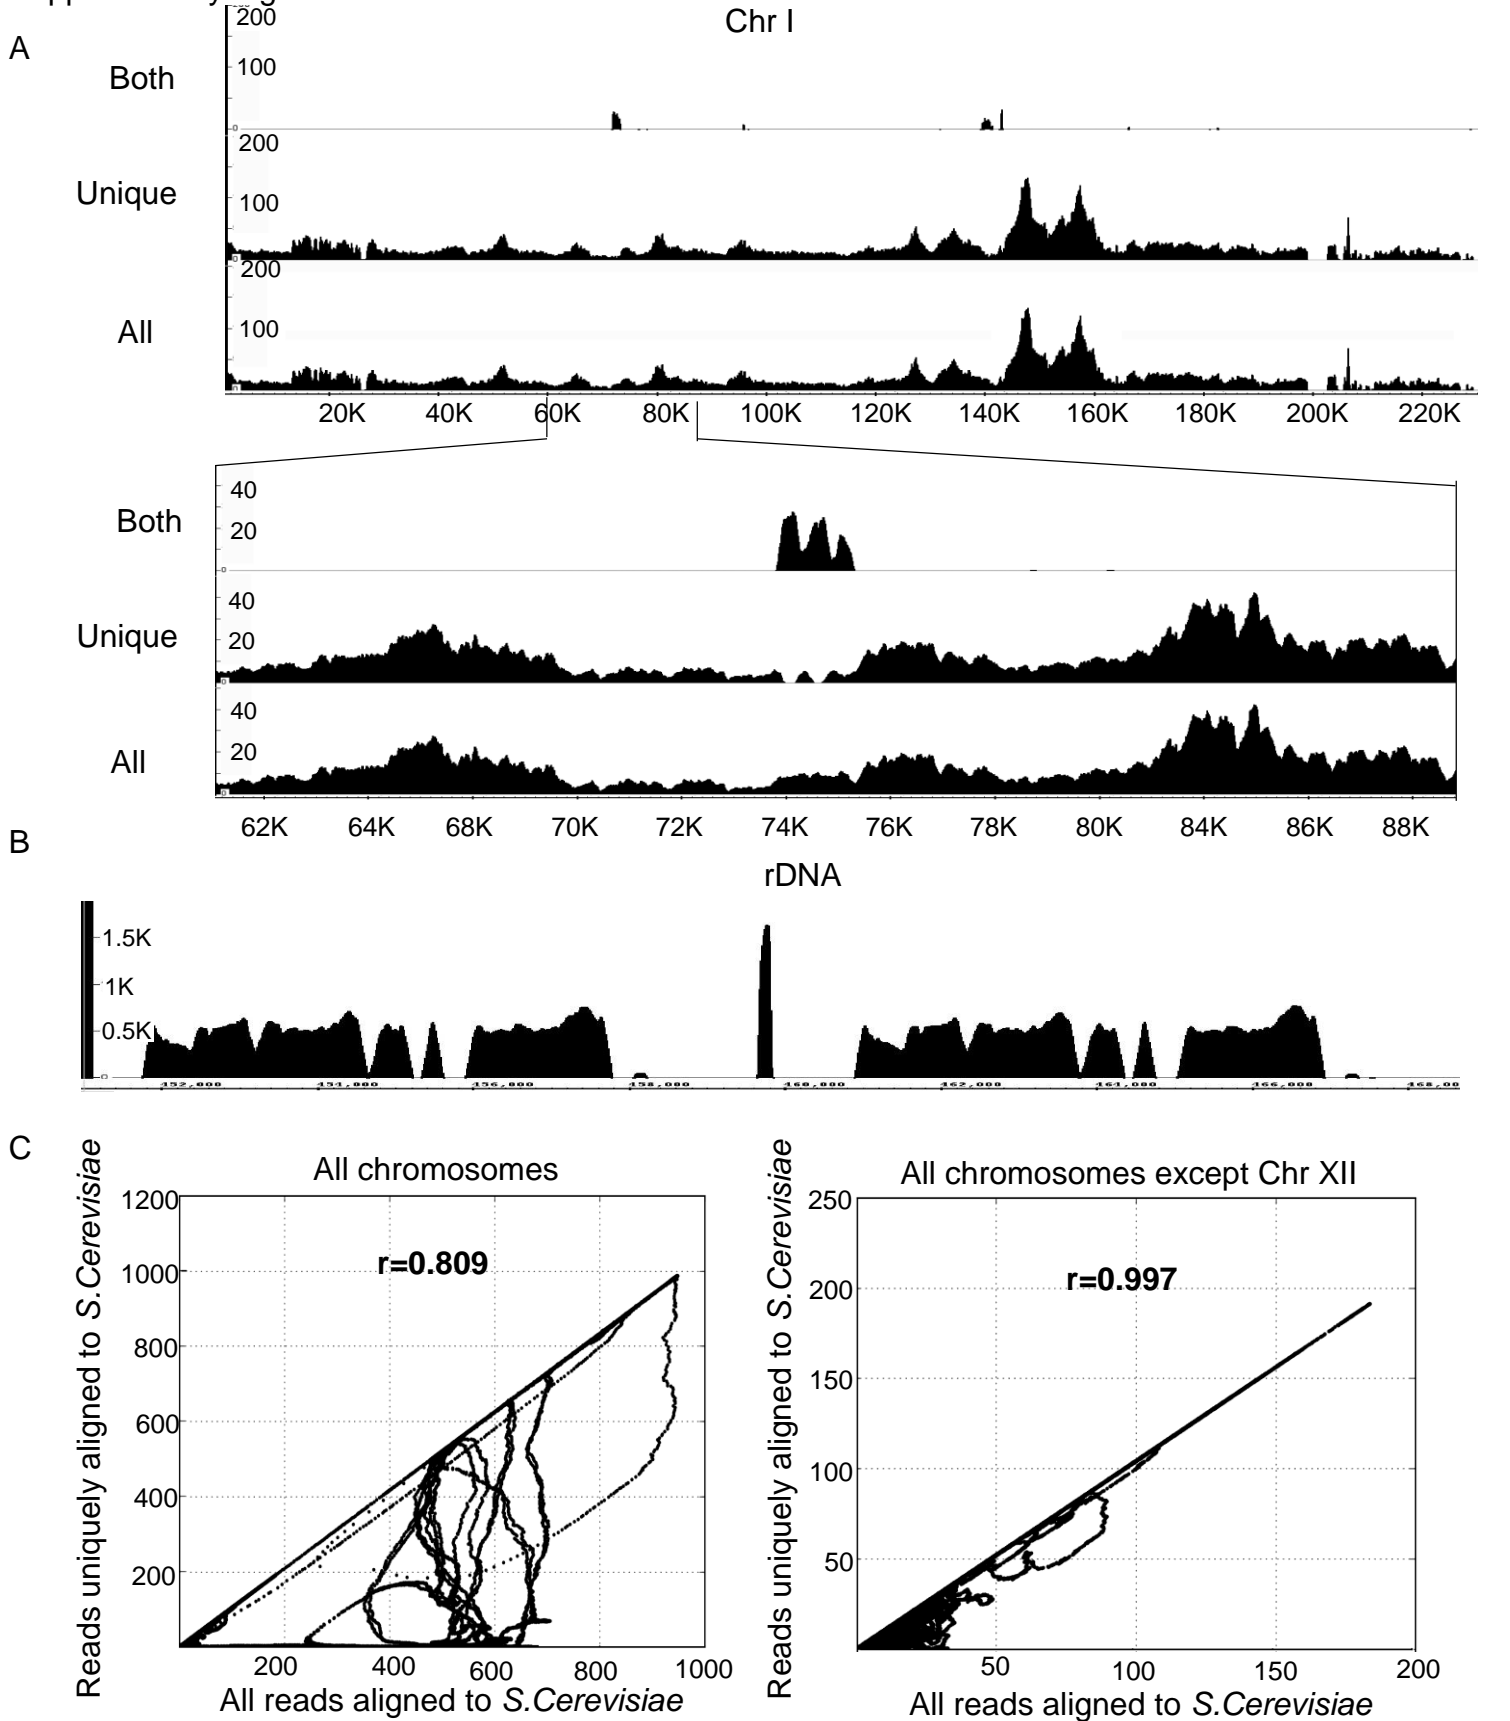

Supplementary Fig 3.

Regions within the *S. cerevisiae* genome whose sequences align with those of *C. glabrata*. (A) ChIP-seq sequences from *S. cerevisiae* only that align to both *S. cerevisiae* and *C. glabrata* genomes mapped onto chromosome 1 from *S. cerevisiae* (top), ChIP-seq sequences from *S. cerevisiae* only that align only to *S. cerevisiae* (middle), and ChIP-seq sequences from *S. cerevisiae* only mapped onto its chromosome I (bottom). All on the basis of reads per million. The overall profile of Chr I shown on the top three panels and a more detailed profile of a region (62,000-88,000) shown in the bottom panels. (B) ChIP-seq sequences from *S. cerevisiae* only that align to both genomes mapped onto rDNA region on chromosome XII from *S. cerevisiae*. (C) Correlations between ChIP-seq signals derived from all reads and those that

align only to *S. cerevisiae*. The numbers of reads assigned to each base pair of all the chromosomes (left) or all the chromosomes except Chr XII (right) in the alignment using sequences only aligned to *S. cerevisiae* were plotted against those using all the sequences.

Supplementary Fig 4

A

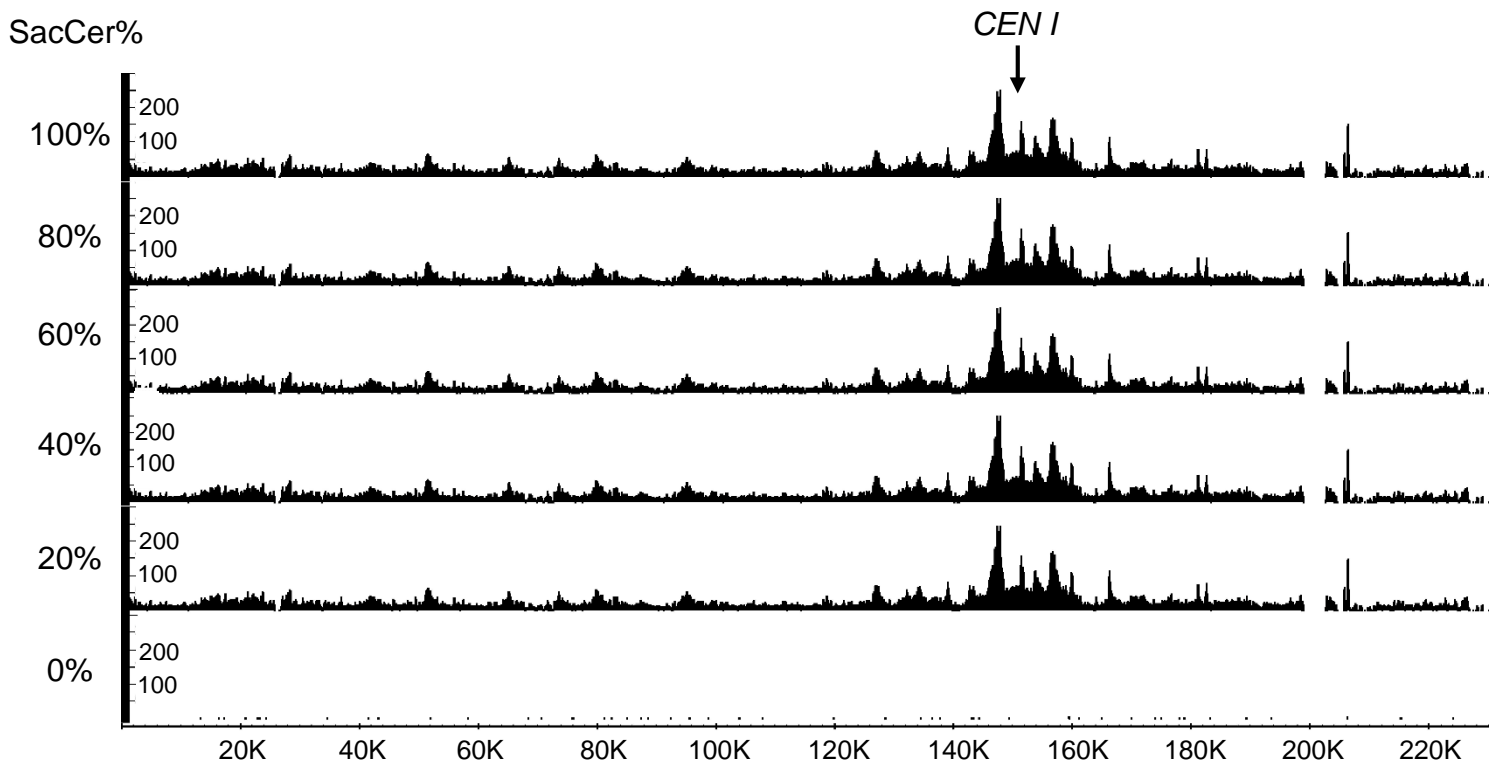

B

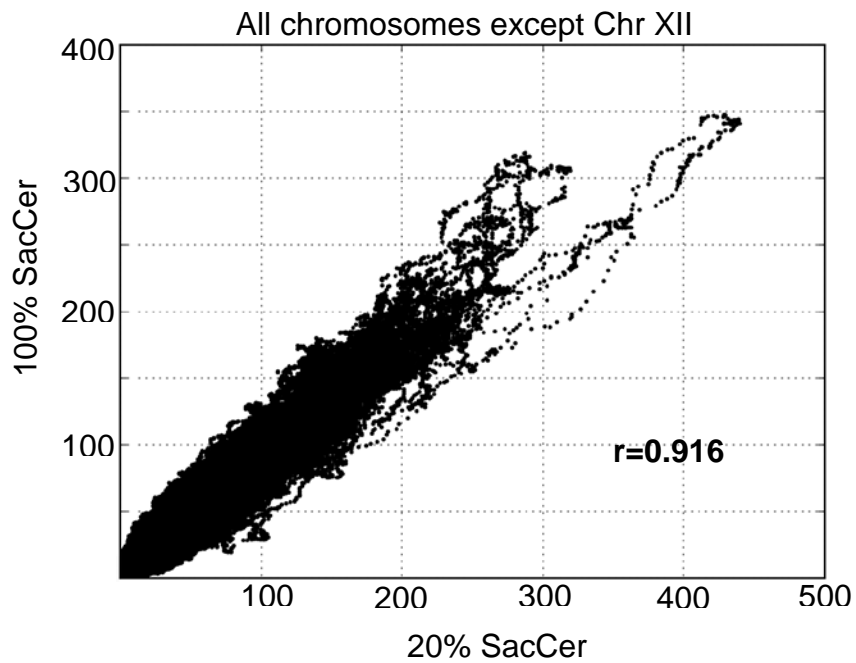

Supplementary Fig 4.

(A) Calibrated ChIP-seq profiles obtained by multiplying the uncalibrated profiles from Fig. 3C by the corresponding ORs. (B) Correlations between ChIP-seq signals derived from SacCer pure culture (100%) and from 20% SacCer mixture. ChIP-seq signals of each base pair except Chr XII bearing rDNA obtained from SacCer pure culture (100%) were plotted against those from 20% SacCer mixture.

Supplementary Fig 5

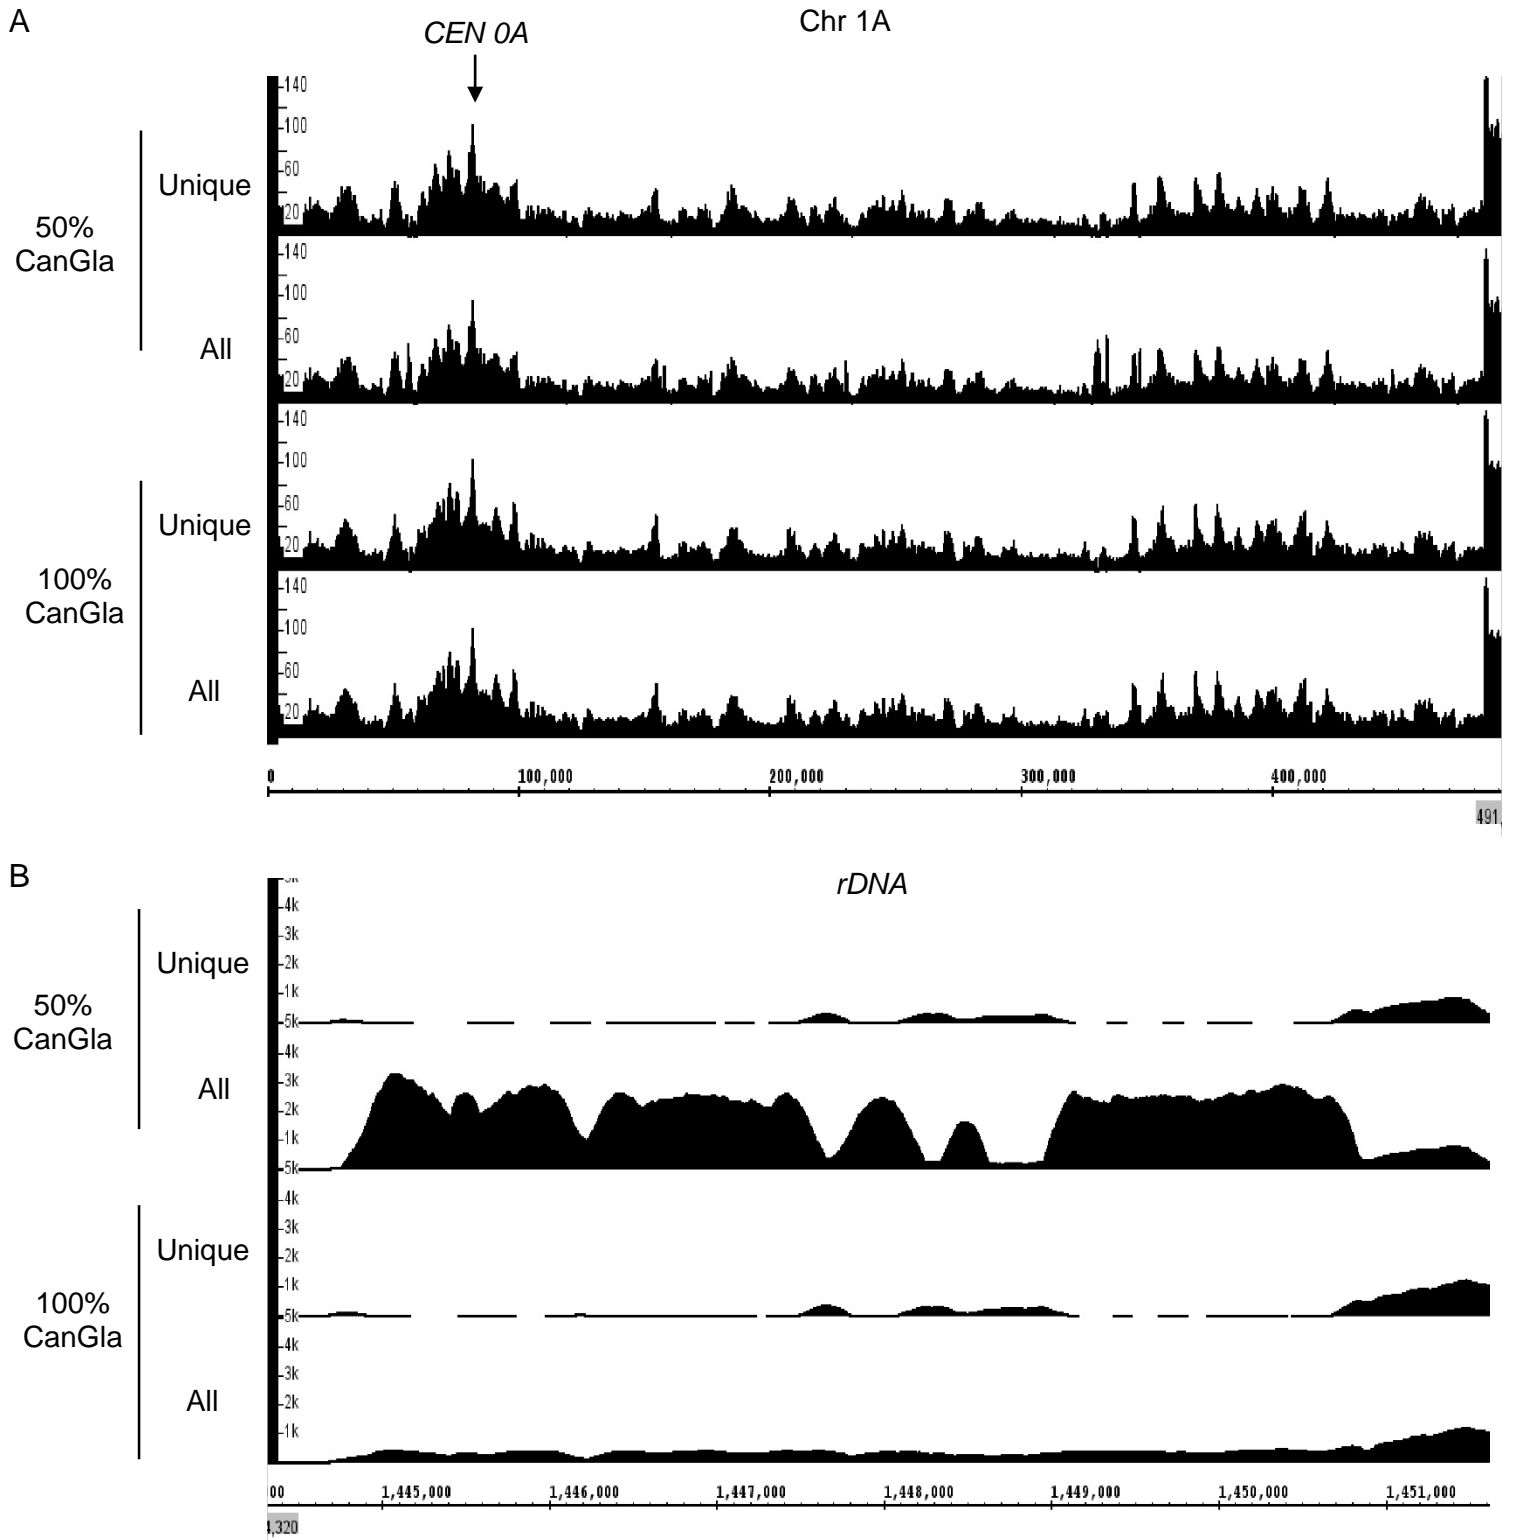

Supplementary Fig 5.

Sequences obtained from ChIP-seq shown in Fig1 B aligned to the *C.glabrata* genome. The distribution of CanGla\_Scc1 on chromosome 1A (A) or rDNA region (B), using alignment either with all reads from a pure *C.glabrata* ChIP-seq or reads unique to *C.glabrata* from ChIP-seq from a *C.glabrata*/*S.cerevisiae* mixture.

Supplementary Fig 6

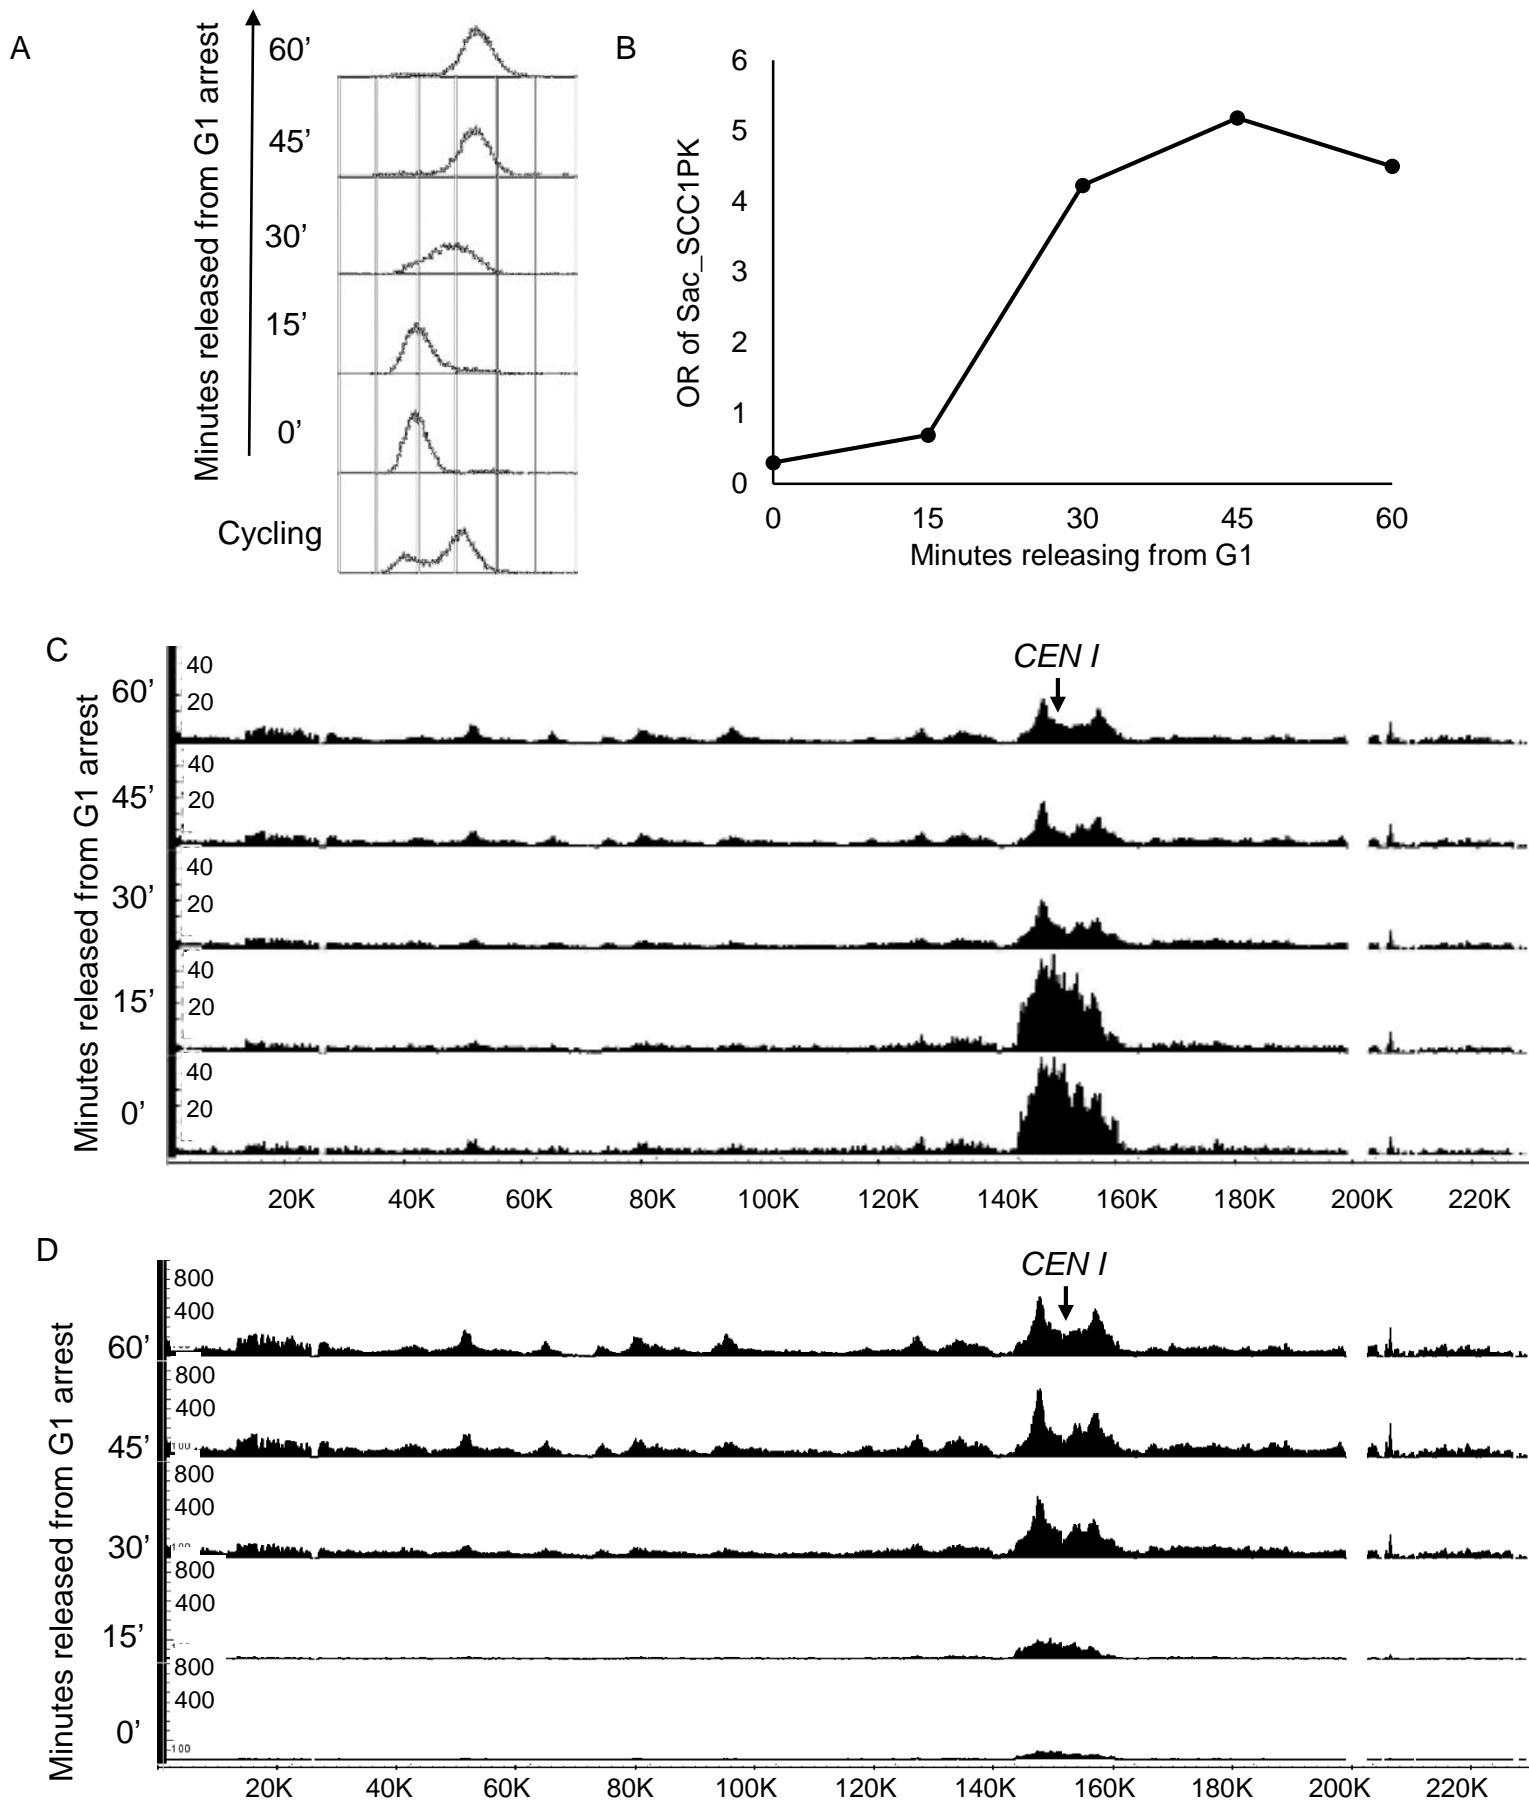

Supplementary Fig. 6.

Exponential phase *S.cerevisiae* cells (K14061) were arrested in G1 with  $\alpha$ -factor and allowed to re-enter the cell cycle by transferring cells to pheromone free YPD media containing nocodazole, which prevents nuclear division. Samples of fixed cells were mixed with pre-fixed *C.glabrata* cells (K23308) and processed for ChIP-seq. (A) DNA content shown by FACS. (B) ORs from each time point after release. (C) Uncalibrated ChIP-seq profile of Scc1 on chromosome 1. (D) Calibrated ChIP-seq profile of Scc1 on chromosome 1.



## Supplementary Fig 7

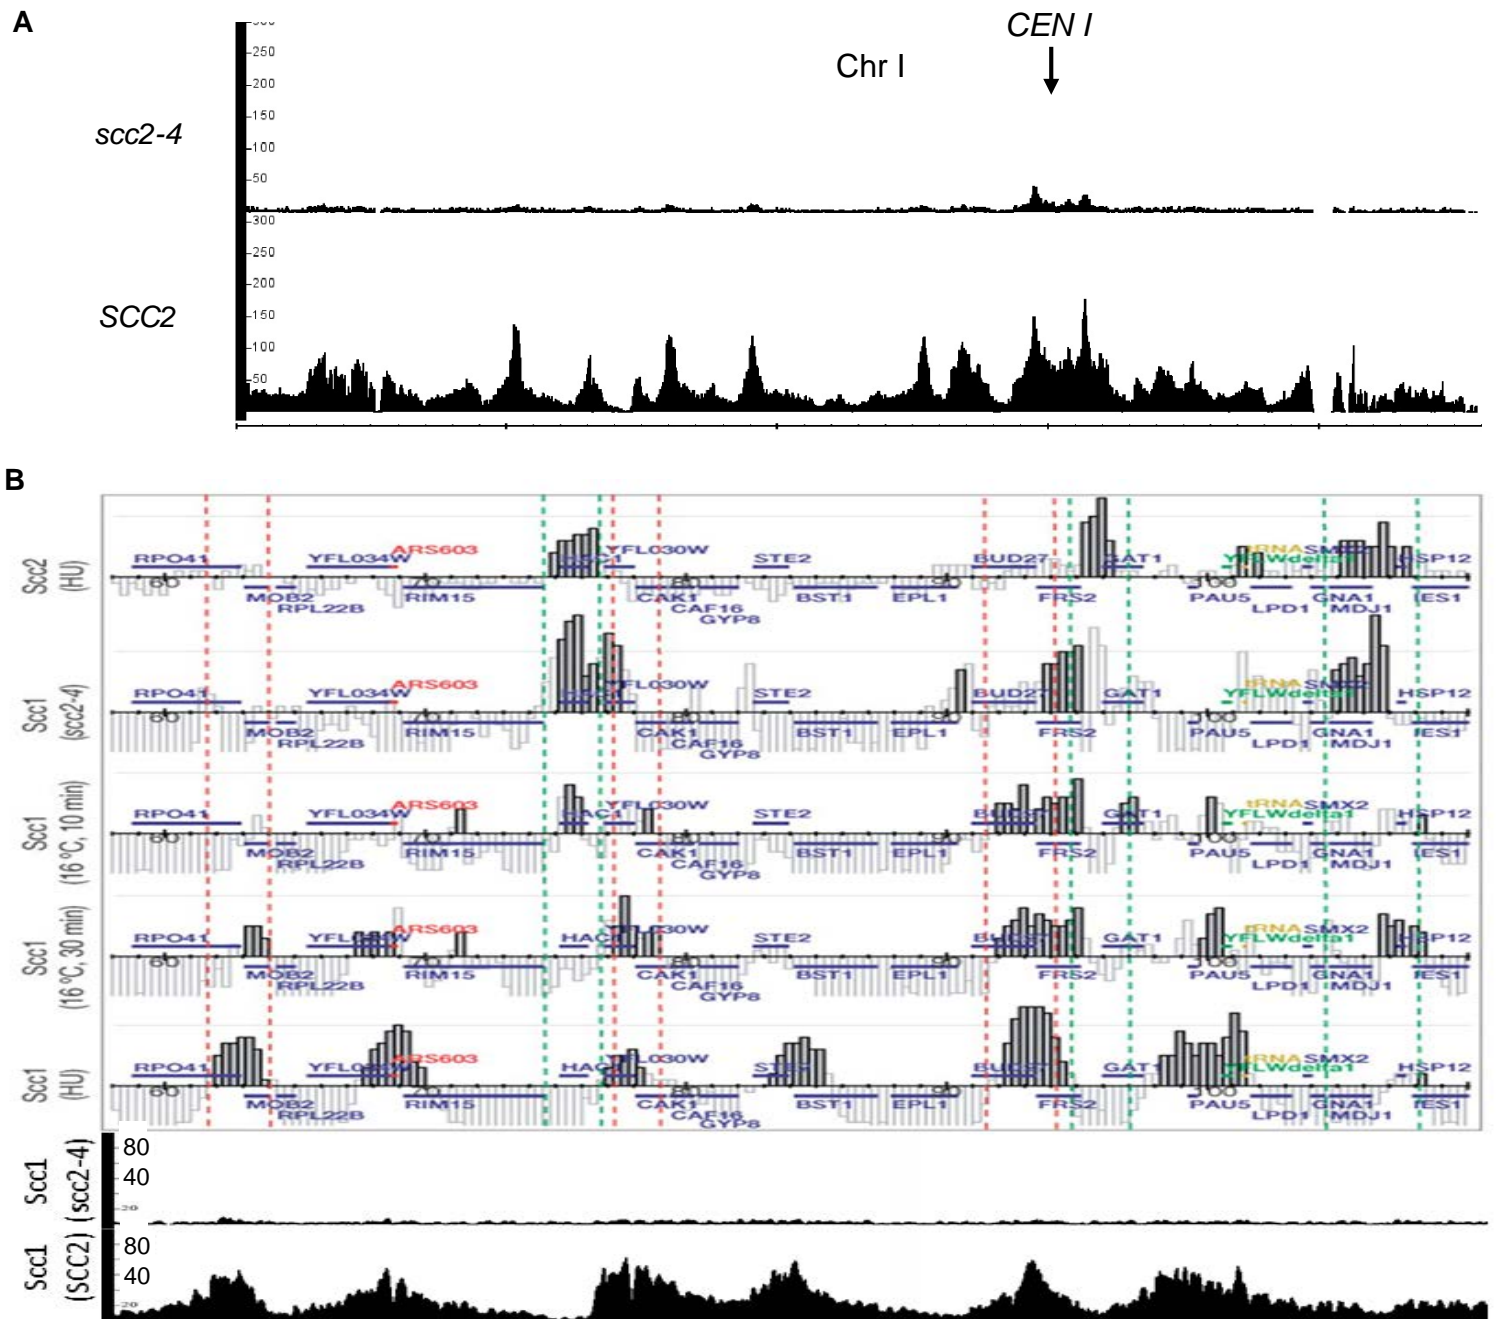

Supplementary Fig 7 Calibrated ChIP-seq profile of Scc1 in the presence or absence of Scc2. G1-arrested *S.cerevisiae* cells with wild type *SCC2* (K14601) or a ts allele *scc2-4* (K14710) were released into YPD media containing nocodazole at the restrictive temperature. After 60 minutes, cells were fixed, mixed with fixed *C.glabrata* cells and calibrated ChIP-seq performed. (A) Calibrated ChIP-seq profiles of chromosome 1. (B) A comparison of the ChIP-microarray data from Lengronne *et al.*, 2004 with the calibrated ChIP-seq data. The first five panels were adapted from Fig 3C in Lengronne *et al.*, 2004. Detail of the localisation on the left arm of chromosome VI, from top to bottom, of Scc2-HA6 in hydroxyurea-arrested cells, Scc1-HA6 in *scc2-4* mutant cells released from G1 into hydroxyurea block at restrictive temperature, Scc1-HA6 in wild-type cells 10 min, and 30 min following release from G1 at 16°C, and Scc1-HA6 in hydroxyurea-arrested wild-type cells. Enrichment in the immunoprecipitated fraction relative to a whole genome DNA sample is shown along the length of the chromosome. Each bar represents the average of 16 oligonucleotide probes within adjacent 300 bp windows. The y-axis scale is log2. Dark grey signals represent significant binding. The green and red dashed lines flank sites usually seen bound by Scc2 and Scc1, respectively. The last two panels are the corresponding calibrated ChIP-seq profiles of Scc1 in wild type and *scc2-4* cells strains described in A. Gratifyingly, the peaks observed by us in wild type cells using calibrated ChIP-seq (bottom panel) correspond to those observed by Lengronne *et al.* Note however that our scale is linear and theirs log2. According to Lengronne *et al.*, these peaks largely disappear in *scc2-4* mutants but are replaced by others that co-incide with peaks of Scc2 binding in wild type cells. This phenomenon is not observed in our calibrated ChIP-seq profiles, implying that they are artefacts caused by background noise, which could not be measured using the uncalibrated technique used by Lengronne *et al.*

Supplementary Fig 8

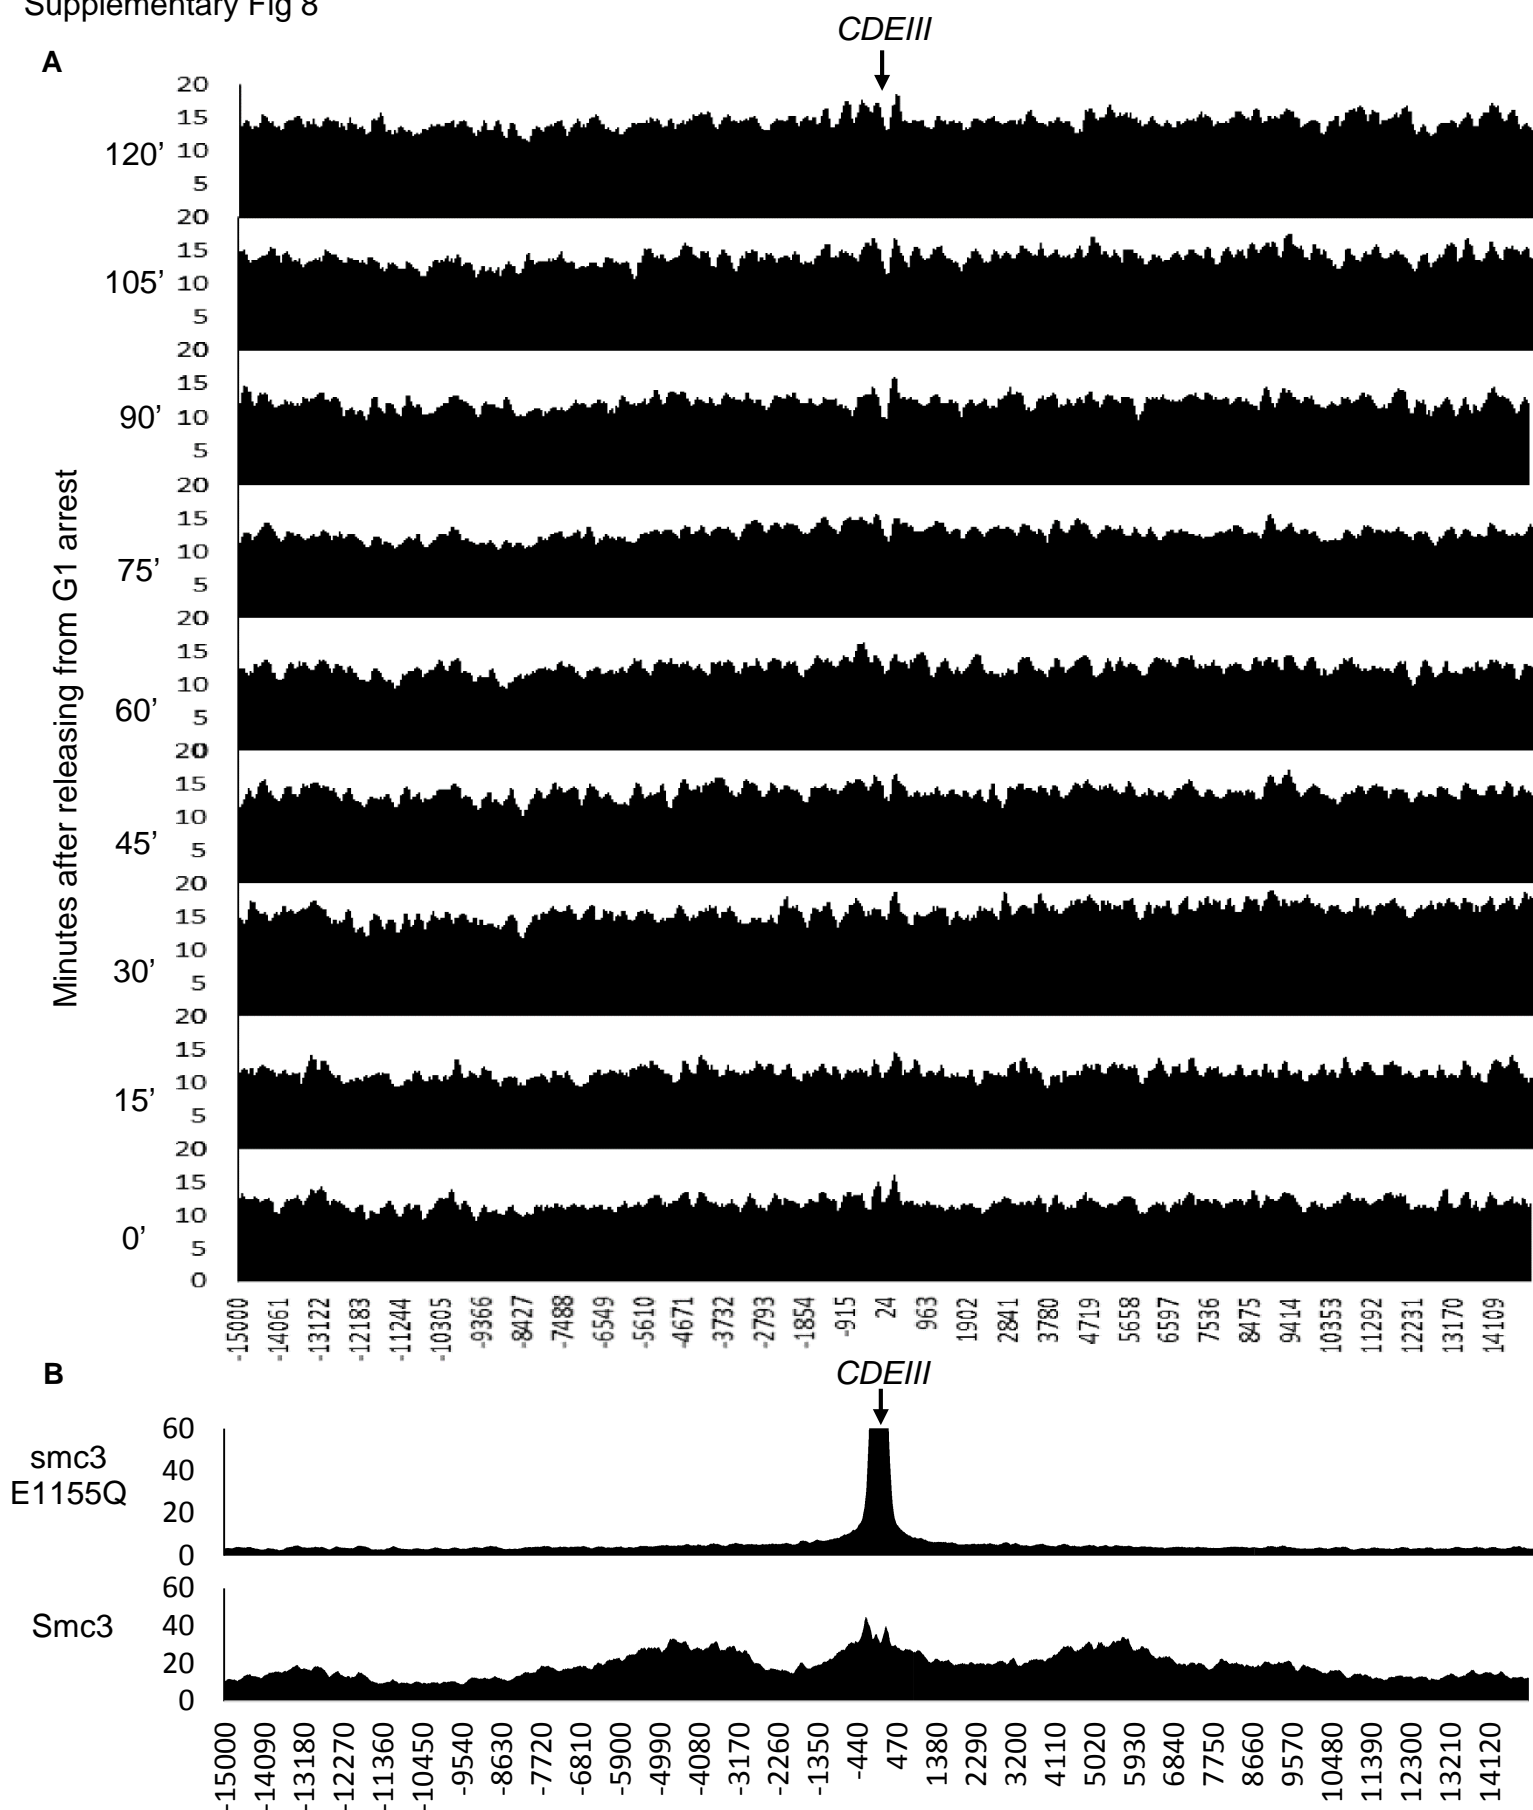

Supplementary Fig. 8.

(A) DNAs from whole cell extracts (W) in the experiment described in Fig 3 were sequenced and aligned to *S.cerevisiae* genome. The number of reads per base pair (Y-axis) in the 15kb regions either side of the CDEIII for each chromosome (X-axis) were averaged. (B) The detailed cohesin distribution in cycling Smc3 WT and E1155Q ATP hydrolysis mutant cells with a smaller Y-axis scale from Fig 8B. The E1155Q peak has been truncated.

## Supplemental movie 1

Tetraploid yeast cells in which endogenous Scc1 or Mtw1 was fused with EGFP and mCherry respectively (K18719) were grown in YPD at 25°C and transferred to a microscopy slide with a media-containing agarose patch. The cells were observed under PE spinning disc confocal microscope. The pictures were taken every 2 minutes.

Supplementary Table 1 The Strains used in this study

| Strain no | Genotype                                                                       |
|-----------|--------------------------------------------------------------------------------|
| K699      | <i>MATa, ade2-1, trp1-1, can1-100, leu2-3,112, his3-11,15, ura3, GAL, psi+</i> |
| K14061    | <i>Mat a, Scc1PK9::KanMX</i>                                                   |
| K14710    | <i>MAT a, Scc1PK9::KanMX, scc2-4</i>                                           |
| K17407    | <i>MATa, trp1::Smc3PK6::TRP1</i>                                               |
| K17409    | <i>MATa, trp1::smc3(E1155Q)PK6::TRP1</i>                                       |
| K18719    | <i>MATa/a/a/a, SCC1EGFP::HIS3, Mtw1-RFP:KanMX, ADE2</i>                        |
| K22390    | <i>MATa, Scc1PK9::KanMX, scc2-45</i>                                           |
| K22703    | <i>MATa, trp1::smc3(K112Q, K113Q)PK6::TRP1</i>                                 |
| K23308    | <i>C.glabrata, Mat a, Scc1PK9::NatMX</i>                                       |

Supplementary Table 2 Summary of ChIP-seq

| Figs     | Experiments |     | Reads used in alignment | Uniquely mapped to <i>S.cerevisiae</i> | Uniquely mapped to <i>C.glabrata</i> | Mapped to both genomes |        |
|----------|-------------|-----|-------------------------|----------------------------------------|--------------------------------------|------------------------|--------|
| 1        | 100%SacCer  | IP  | 8649638                 | 8149434                                | 2742                                 | 333244                 |        |
|          |             | WCE | 5167495                 | 4740954                                | 472                                  | 249885                 |        |
|          | 50%SacCer   | IP  | 8413598                 | 5155020                                | 2852480                              | 270814                 |        |
|          |             | WCE | 6267558                 | 2070269                                | 3884251                              | 187540                 |        |
|          | 100%CanGla  | IP  | 7945771                 | 11513                                  | 7681970                              | 127372                 |        |
|          |             | WCE | 6302634                 | 1327                                   | 6077692                              | 162983                 |        |
| 2        | 100%SacCer  | IP  | 8187797                 | 7448960                                | 4375                                 | 391479                 |        |
|          |             | WCE | 9931526                 | 8858474                                | 258                                  | 578666                 |        |
|          | 80%SacCer   | IP  | 6503237                 | 4807985                                | 1169076                              | 282471                 |        |
|          |             | WCE | 14421988                | 9819225                                | 3423828                              | 701231                 |        |
|          | 60%SacCer   | IP  | 7195107                 | 3898658                                | 2742289                              | 299300                 |        |
|          |             | WCE | 7510027                 | 3509427                                | 3476955                              | 344982                 |        |
|          | 40%SacCer   | IP  | 5617248                 | 1952501                                | 3133843                              | 194610                 |        |
|          |             | WCE | 8811110                 | 2516456                                | 5737817                              | 351168                 |        |
|          | 20%SacCer   | IP  | 11067924                | 1816853                                | 8671375                              | 293720                 |        |
|          |             | WCE | 4484097                 | 554139                                 | 3699691                              | 164315                 |        |
|          | 0%SacCer    | IP  | 6300664                 | 4358                                   | 5979285                              | 134250                 |        |
|          |             | WCE | 4844809                 | 357                                    | 4618598                              | 166346                 |        |
|          | 4           | 0'  | IP                      | 7543996                                | 1715056                              | 5263874                | 260471 |
|          |             |     | WCE                     | 4799271                                | 2149440                              | 1824440                | 216780 |
| 15'      |             | IP  | 7681260                 | 1881873                                | 5247733                              | 288333                 |        |
|          |             | WCE | 3835067                 | 1227278                                | 943047                               | 129176                 |        |
| 30'      |             | IP  | 7462394                 | 3457095                                | 3389708                              | 413464                 |        |
|          |             | WCE | 4088149                 | 1479460                                | 1537002                              | 150133                 |        |
| 45'      |             | IP  | 8000705                 | 5751973                                | 1632536                              | 390736                 |        |
|          |             | WCE | 4142400                 | 2003686                                | 880835                               | 139048                 |        |
| 60'      |             | IP  | 7901072                 | 5364612                                | 1880565                              | 457384                 |        |
|          |             | WCE | 4037989                 | 2015483                                | 1067352                              | 159223                 |        |
| 75'      |             | IP  | 8742623                 | 5425977                                | 2627861                              | 482907                 |        |
|          |             | WCE | 8109238                 | 4156022                                | 2370402                              | 349516                 |        |
| 90'      |             | IP  | 8281167                 | 3709947                                | 3925376                              | 436316                 |        |
|          |             | WCE | 4037514                 | 1927183                                | 1221604                              | 167245                 |        |
| 105'     |             | IP  | 8510608                 | 4966486                                | 2820996                              | 513929                 |        |
|          |             | WCE | 3535912                 | 1724098                                | 1011956                              | 141023                 |        |
| 120'     |             | IP  | 7587642                 | 5412167                                | 1526342                              | 448663                 |        |
|          |             | WCE | 3823932                 | 2029288                                | 950066                               | 147404                 |        |
| 6 and S7 | Scc1        | IP  | 7074281                 | 212015                                 | 6488523                              | 193026                 |        |
|          |             | WCE | 5190484                 | 2658954                                | 1952406                              | 245065                 |        |
|          | Scc1-PK9    | IP  | 7807015                 | 5325623                                | 2034825                              | 241734                 |        |
|          |             | WCE | 3974258                 | 2208634                                | 1288338                              | 199282                 |        |
|          | scc2-45     | IP  | 11825641                | 1933071                                | 9485933                              | 80169                  |        |
|          |             | WCE | 11395420                | 4729218                                | 6128951                              | 228601                 |        |
|          | WT          | IP  | 6244312                 | 3869289                                | 2174583                              | 71334                  |        |
|          |             | WCE | 11831591                | 5343407                                | 6008495                              | 191748                 |        |
|          | scc2-4      | IP  | 8477187                 | 567386                                 | 7253166                              | 44165                  |        |
|          |             | WCE | 11123673                | 2880422                                | 7804500                              | 237480                 |        |

| Figs | Experiments            |     | Reads used in alignment | Uniquely mapped to <i>S.cerevisiae</i> | Uniquely mapped to <i>C.glabrata</i> | Mapped to both genomes |
|------|------------------------|-----|-------------------------|----------------------------------------|--------------------------------------|------------------------|
| 7    | smc3<br>K112Q<br>K113Q | IP  | 7382100                 | 1496755                                | 5311205                              | 362779                 |
|      |                        | WCE | 6513219                 | 3593771                                | 2397198                              | 380127                 |
|      | smc3<br>E1155Q         | IP  | 7308322                 | 2003371                                | 4762496                              | 374889                 |
|      |                        | WCE | 9545913                 | 5485553                                | 3295436                              | 569322                 |
|      | Smc3                   | IP  | 5139660                 | 2318971                                | 2398303                              | 325977                 |
|      |                        | WCE | 7678693                 | 4355238                                | 2695373                              | 466759                 |
| S5   | 0'                     | IP  | 8176945                 | 1147587                                | 6685318                              | 154108                 |
|      |                        | WCE | 7191787                 | 2454652                                | 4338134                              | 270550                 |
|      | 15'                    | IP  | 7773362                 | 2896497                                | 4542125                              | 147636                 |
|      |                        | WCE | 5611224                 | 2540812                                | 2759138                              | 191378                 |
|      | 30'                    | IP  | 9430721                 | 7377225                                | 1637029                              | 224316                 |
|      |                        | WCE | 5996454                 | 2907268                                | 2727325                              | 207624                 |
|      | 45'                    | IP  | 9239164                 | 7433012                                | 1356368                              | 224316                 |
|      |                        | WCE | 6719251                 | 3253102                                | 3076632                              | 235479                 |
|      | 60'                    | IP  | 8879382                 | 6864050                                | 1546378                              | 329778                 |
|      |                        | WCE | 7292148                 | 3410023                                | 3455545                              | 271200                 |
